# Supplementary material
Source: MDPI journal article supplement (https://www.mdpi.com/1999-4907/14/8/1683)
Supplement: s1 [file s1]

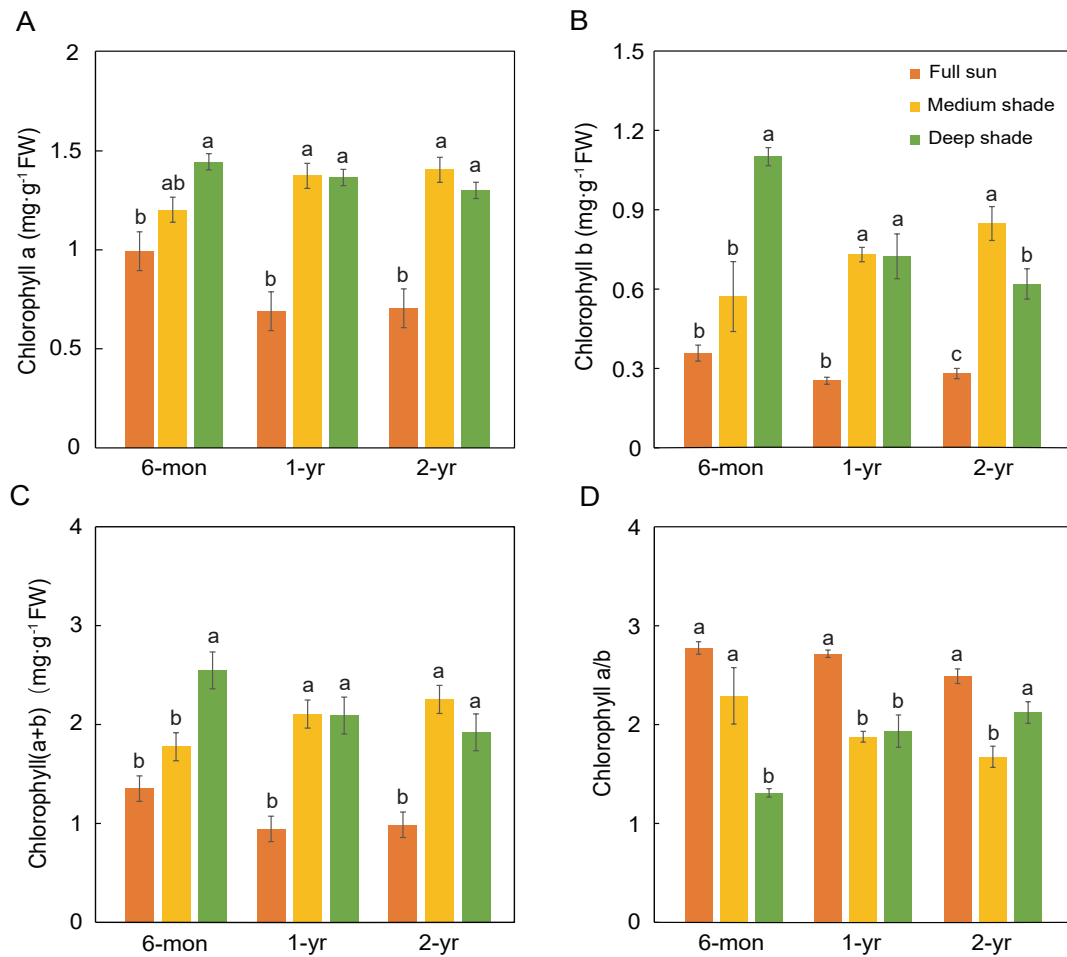

**Supplementary Figure S1. Chlorophyll contents of *Phoebe bournei* with different ages under sun and shade treatments.** Contents of chlorophyll a (**A**), chlorophyll b (**B**) and the sum of chlorophyll a and b (**C**). (**D**) Chlorophyll a/b, the ratio of chlorophyll a to chlorophyll b. Values (mean  $\pm$  S.E., n=3) followed by different letters for each plantlets age under three light treatments are significantly different at  $P < 0.05$  based on LSD test.

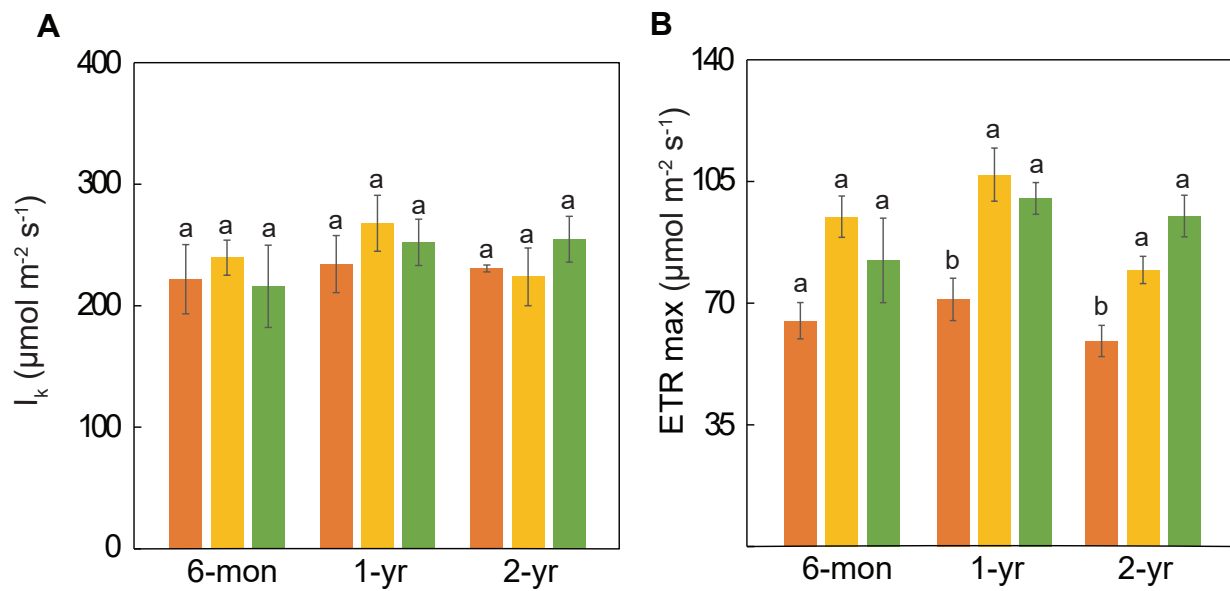

**Supplementary Figure S2. The chlorophyll fluorescence parameter of *Phoebe bournei* with different ages under sun and shade treatments. (A)  $I_k$ , the light saturation point. (B) ETR<sub>max</sub>, maximum rate of electron transport. Values (mean  $\pm$  S.E., n=4) followed by different letters for each plantlets age under three light treatments are significantly different at  $P < 0.05$  based on LSD test.**

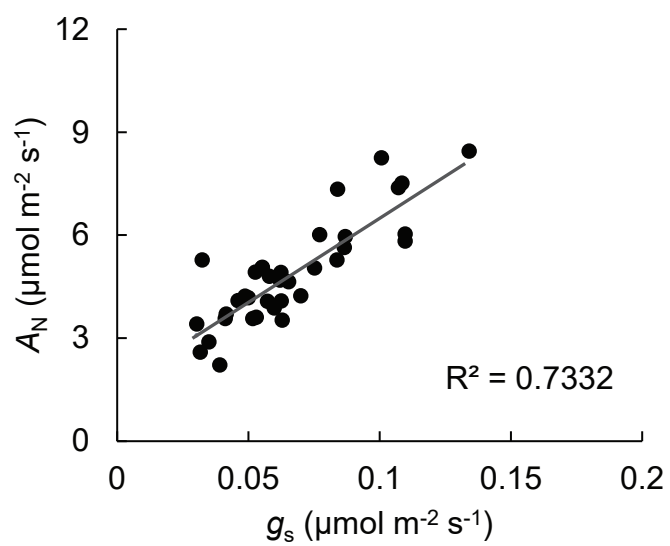

**Supplementary Figure S3. Positive correlations between  $A_N$  and  $g_s$  of *Phoebe bournei*.**

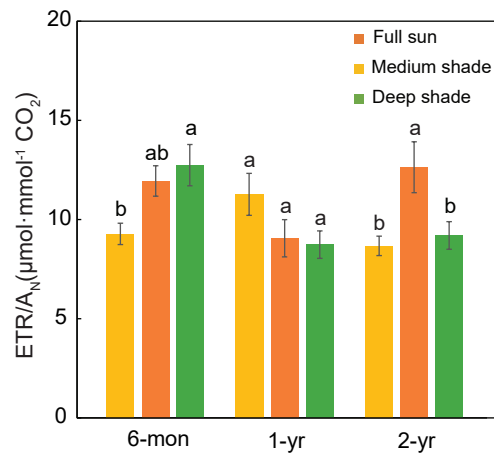

**Supplementary Figure S4. The responses of ratio of electron transport rate to net photosynthetic rate ( $ETR(II)/A_N$ ) to sun and shade of *Phoebe bournei* with different ages.** Values (mean  $\pm$  S.E.,  $n=4$ ) followed by different letters for each plantlets age under three light treatments are significantly different at  $P < 0.05$  based on LSD test.
